# Supplementary material for: Assessment of Appropriateness of Antimicrobial Therapy in Resource-Constrained Settings: Development and Piloting of a Novel Tool—AmRAT
Source: MDPI journal article supplement (doi:10.3390/antibiotics10020200), 2021-02-19
Supplement: s1 [file s1]

**Supplementary Table S1: Sensitivity, specificity and correctly classified (Expert as Gold standard)**

| <b>Choice of antimicrobial</b> |          | <b>Sensitivity</b> | <b>Specificity</b> | <b>Correctly classified</b> |
|--------------------------------|----------|--------------------|--------------------|-----------------------------|
| <b>Group A</b>                 | <b>1</b> | 96%                | 83%                | 93%                         |
|                                | <b>2</b> | 79%                | 67%                | 77%                         |
|                                | <b>3</b> | 67%                | 100%               | 73%                         |
| <b>Group B</b>                 | <b>1</b> | 83%                | 100%               | 87%                         |
|                                | <b>2</b> | 71%                | 100%               | 77%                         |
|                                | <b>3</b> | 92%                | 33%                | 80%                         |
| <b>Group C</b>                 | <b>1</b> | 83%                | 83%                | 83%                         |
|                                | <b>2</b> | 83%                | 100%               | 87%                         |
|                                | <b>3</b> | 83%                | 50%                | 77%                         |
|                                | <b>4</b> | 88%                | 50%                | 80%                         |
| <b>Dose</b>                    |          |                    |                    |                             |
| <b>Group A</b>                 | <b>1</b> | 100%               | 29%                | 83%                         |
|                                | <b>2</b> | 96%                | 29%                | 80%                         |
|                                | <b>3</b> | 83%                | 71%                | 80%                         |
| <b>Group B</b>                 | <b>1</b> | 87%                | 86%                | 87%                         |
|                                | <b>2</b> | 78%                | 86%                | 80%                         |
|                                | <b>3</b> | 100%               | 57%                | 90%                         |
| <b>Group C</b>                 | <b>1</b> | 91%                | 71%                | 87%                         |
|                                | <b>2</b> | 91%                | 71%                | 87%                         |
|                                | <b>3</b> | 91%                | 57%                | 83%                         |
|                                | <b>4</b> | 96%                | 57%                | 87%                         |
| <b>Duration</b>                |          |                    |                    |                             |
| <b>Group A</b>                 | <b>1</b> | 92%                | 57%                | 79%                         |
|                                | <b>2</b> | 89%                | 86%                | 88%                         |
|                                | <b>3</b> | 100%               | 100%               | 100%                        |
| <b>Group B</b>                 | <b>1</b> | 89%                | 71%                | 81%                         |
|                                | <b>2</b> | 89%                | 86%                | 88%                         |
|                                | <b>3</b> | 100%               | 71%                | 87%                         |
| <b>Group C</b>                 | <b>1</b> | 80%                | 71%                | 76%                         |
|                                | <b>2</b> | 89%                | 71%                | 81%                         |
|                                | <b>3</b> | 100%               | 100%               | 100%                        |
|                                | <b>4</b> | 100%               | 80%                | 93%                         |
| <b>Overall rationality</b>     |          |                    |                    |                             |
| <b>Group A</b>                 | <b>1</b> | 100%               | 57%                | 80%                         |
|                                | <b>2</b> | 88%                | 64%                | 77%                         |
|                                | <b>3</b> | 69%                | 79%                | 73%                         |

|                |          |     |     |     |
|----------------|----------|-----|-----|-----|
| <b>Group B</b> | <b>1</b> | 75% | 71% | 73% |
|                | <b>2</b> | 38% | 93% | 63% |
|                | <b>3</b> | 94% | 43% | 70% |
| <b>Group C</b> | <b>1</b> | 81% | 79% | 80% |
|                | <b>2</b> | 81% | 79% | 80% |
|                | <b>3</b> | 88% | 71% | 80% |
|                | <b>4</b> | 88% | 50% | 70% |

*Group A: M.Sc. (Pharmacology); Group B: MD residents; Group C: DM (Clinical Pharmacology) residents*
